# Supplementary material
Source: MDPI journal article supplement (https://www.mdpi.com/2071-1050/11/1/76)
Supplement: s1 [file s1]

**Supplementary Materials:**

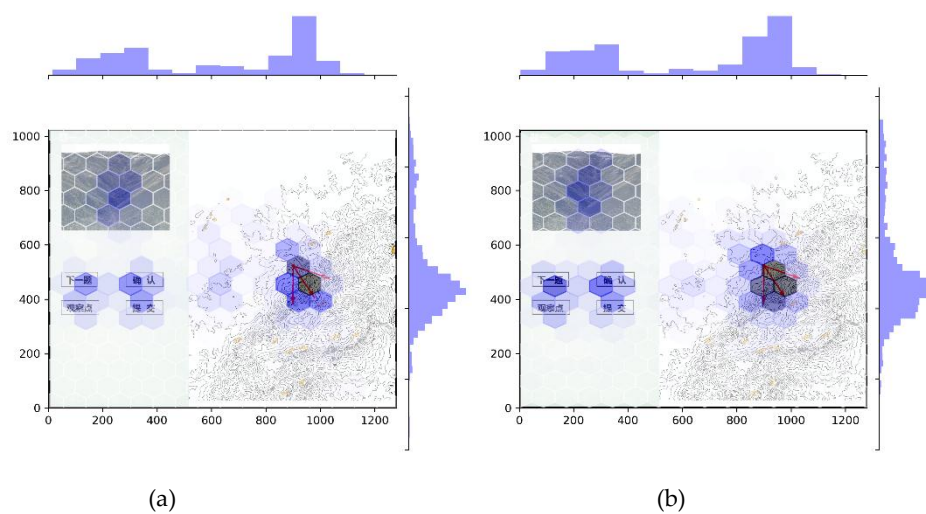

**Figure S1.** Hexbin plots for task 1. (a) Before training (b) after training.

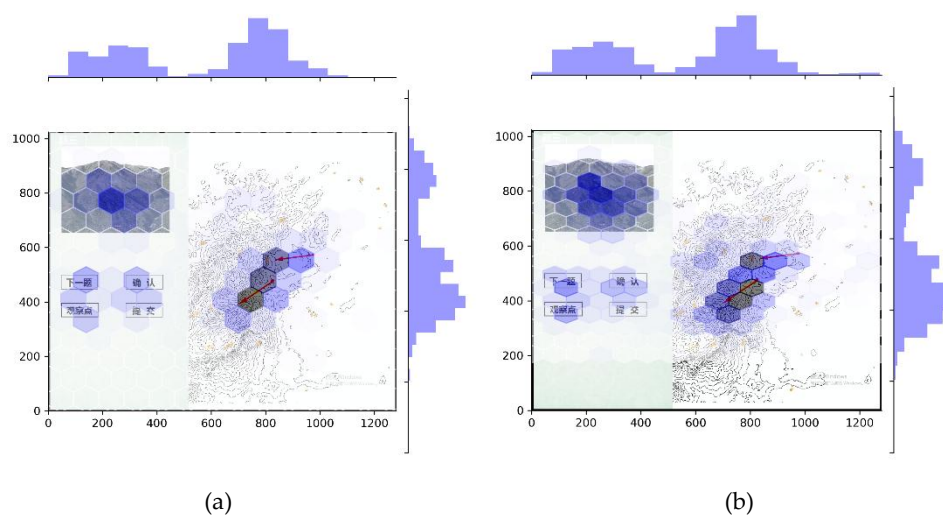

**Figure S2.** Hexbin plots for task 2. (a) Before training (b) after training.

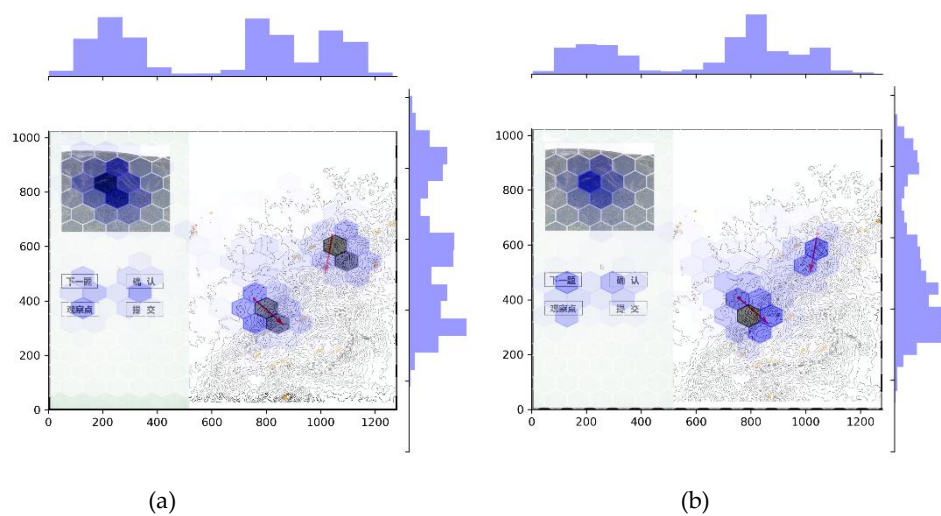

**Figure S3.** Hexbin plots for task 3. (a) Before training (b) after training.

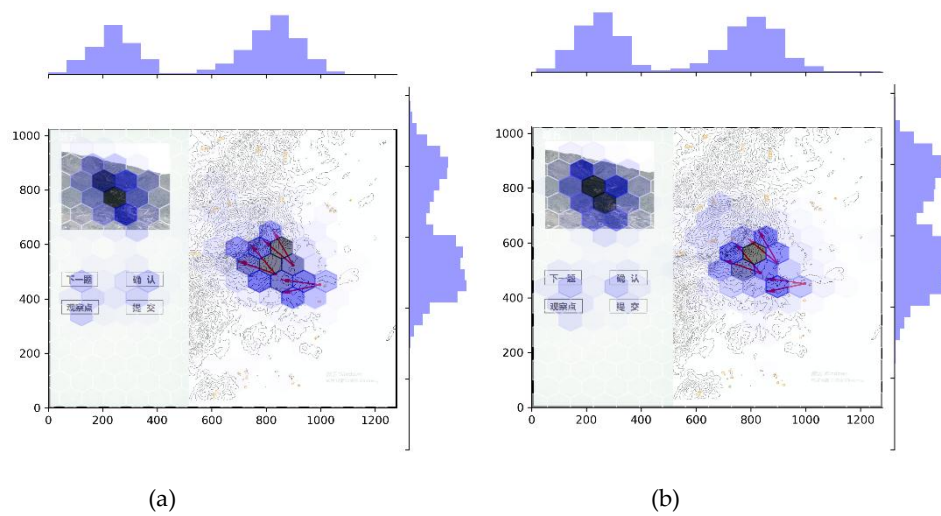

**Figure S4.** Hexbin plots for task 4. (a) Before training (b) after training.

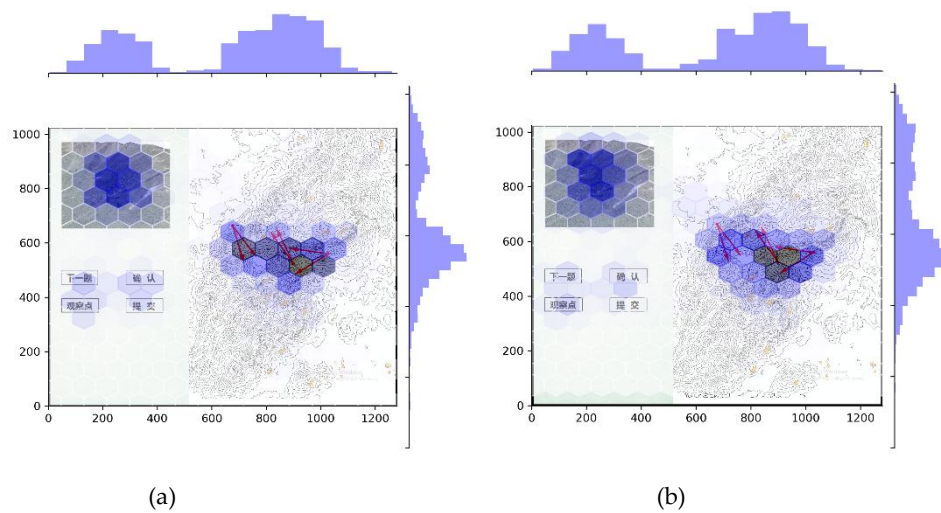

**Figure S5.** Hexbin plots for task 5. (a) Before training (b) after training.

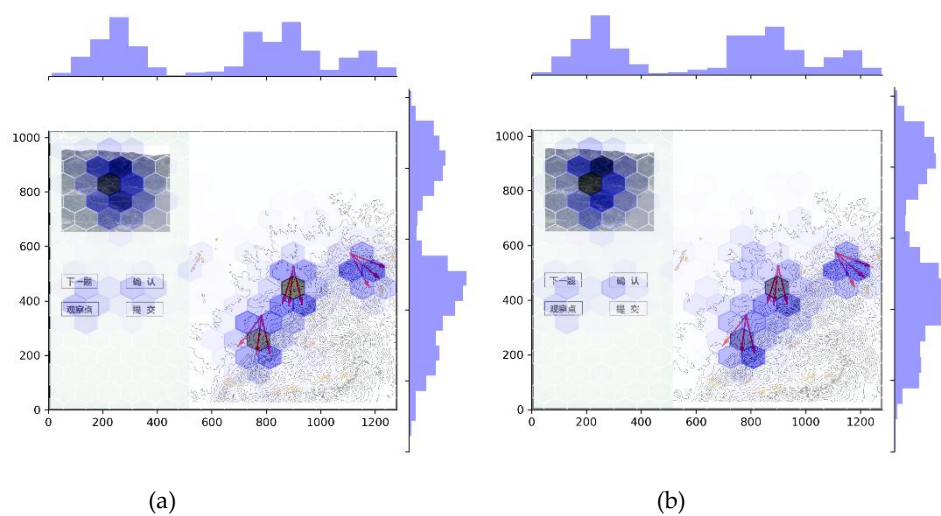

**Figure S6.** Hexbin plots for task 6. (a) Before training (b) after training.

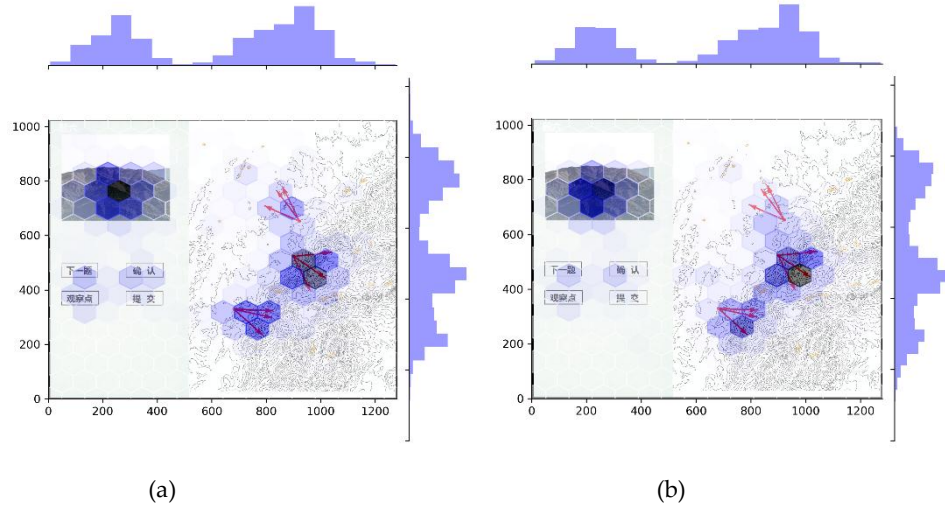

**Figure S7.** Hexbin plots for task 7. (a) Before training (b) after training.

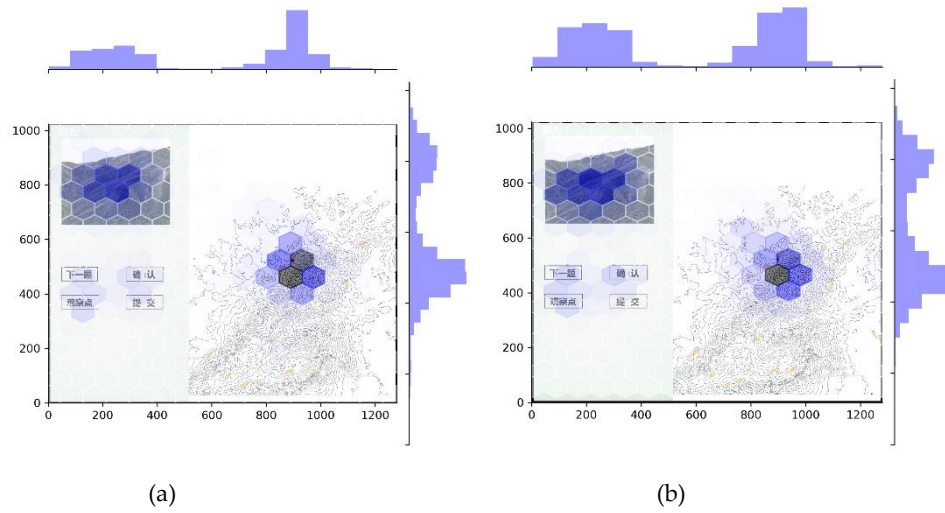

**Figure S8.** Hexbin plots for task 8. (a) Before training (b) after training.

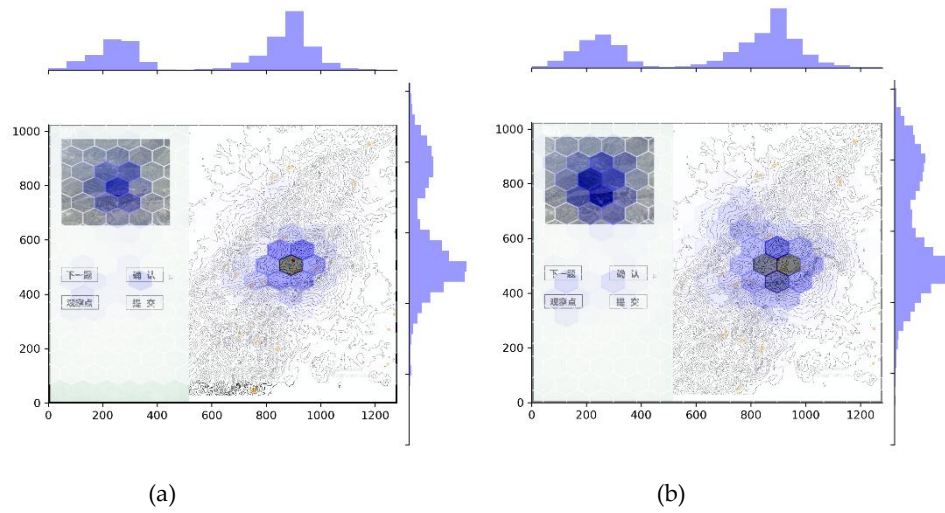

**Figure S9.** Hexbin plots for task 9. (a) Before training (b) after training.

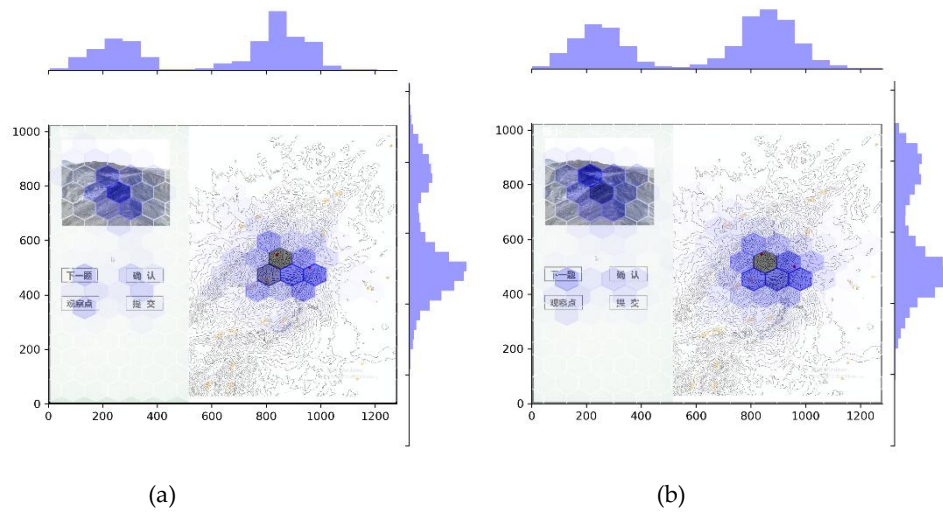

**Figure S10.** Hexbin plots for task 10. (a) Before training (b) after training.

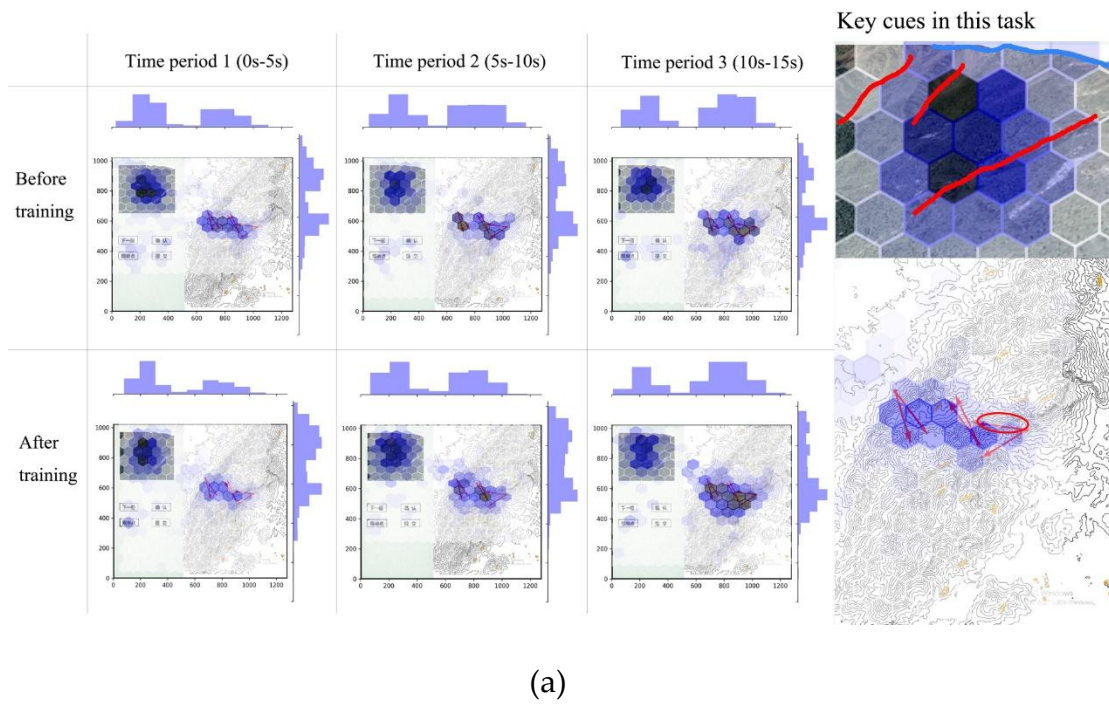

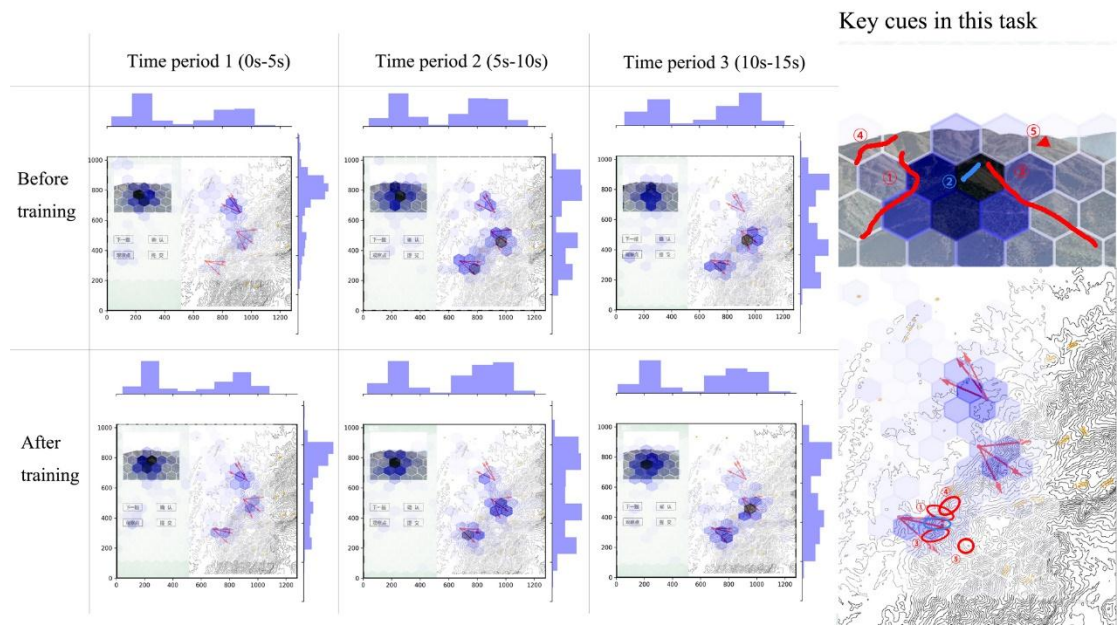

(b)

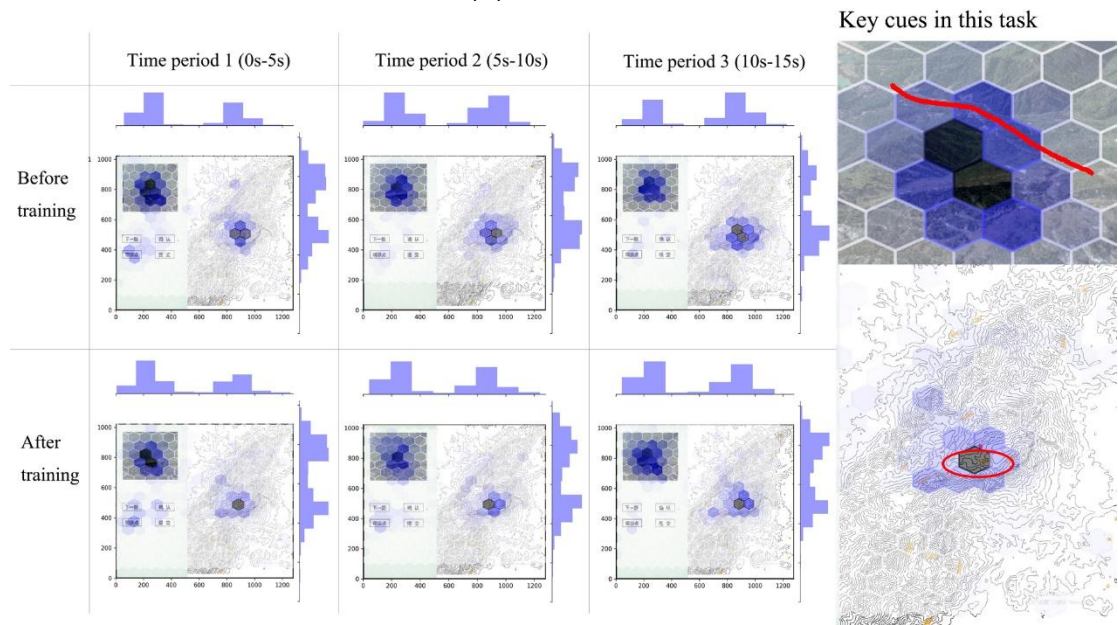

(c)

**Figure S11.** Comparison of visual attention in three periods between the first test and the second test. The darkness of the colour indicates the fixation count of a hexagon; the darkest blue indicates the highest values. (a) task 5, (b) task 7 and (c) task 9. Key cues are marked on the red or blue lines and ellipses.
